# Supplementary material
Source: ML conference proceedings conference paper supplement (https://openaccess.thecvf.com/content/CVPR2023/html/Zheng_POTTER_Pooling_Attention_CVPR_2023_paper.html)
Supplement: Supplementary file 2 [file Zheng_POTTER_Pooling_Attention_CVPR_2023_supplemental.zip]

Archive with 2 entries (2 files):
- POTTER_SUPP_ieee.pdf
- demo_2339_POTTER.mp4
